# Supplementary material for: Pannexin 3 ER Ca2+ channel gating is regulated by phosphorylation at the Serine 68 residue in osteoblast differentiation
Source: PubMed Central journal article supplement (PMC6904572; doi:10.1038/s41598-019-55371-9), 2019-12-10

## Supplementary Information

Pannexin 3 ER Ca<sup>2+</sup> channel gating is regulated by phosphorylation at the Serine 68 residue  
in osteoblast differentiation.

Masaki Ishikawa<sup>1‡</sup>, Geneva Williams<sup>2</sup>, Patricia Forcinito<sup>2</sup>, Momoko Ishikawa<sup>3</sup>, Ryan J. Petrie<sup>4</sup>,  
Kan Saito<sup>3</sup>, Satoshi Fukumoto<sup>3</sup>, and Yoshihiko Yamada<sup>2</sup>

<sup>1</sup>Operative Dentistry, Tohoku University Graduate School of Dentistry, Sendai 980-8575, Japan

<sup>2</sup>Molecular Biology Section, National Institute of Dental and Craniofacial Research, National  
Institutes of Health,

<sup>3</sup>Department of Pediatric Dentistry, Tohoku University Graduate School of Dentistry, Sendai  
980-8576, Japan

<sup>4</sup>Department of Biology, Drexel University, Philadelphia, PA 19104, USA

‡Address correspondence to: Masaki Ishikawa, Department of Restorative Dentistry, Division of  
Operative Dentistry, Tohoku University, Graduate School of Dentistry 4-1, Seiryō chō, Aoba-  
ku, Sendai, Miyagi, 980-8575, Sendai, Japan. Tel: [011-81-22-717-8343](tel:011-81-22-717-8343); Fax: [011-81-22-717-  
8344](tel:011-81-22-717-8344); E-mail: [ishikawamas@dent.tohoku.ac.jp](mailto:ishikawamas@dent.tohoku.ac.jp).

## SUPPLEMENTARY INFORMATION LEGENDS

**Supplementary Figure 1.** (A) Cellular localization of cell stably co-transfected with CFP-Panx3 and Panx3-YFP vector (upper) and CFP-Ser68Ala and Ser68-YFP vector (bottom). Fluorescent confocal images showed CFP-Panx3 or Ser68Ala (left, cyan), Panx3 or Ser68Ala-YFP (middle, green) and merged (right, light green). (B) Measurements show a percentage of colocalization between CFP with YFP. NS, nonsignificant.

**Supplementary Movie 1.** Real-time  $\text{Ca}^{2+}$  wave propagation in C2C12 cells transfected with control pEF1 vector. The  $\text{Ca}^{2+}$  wave was measured in C2C12 cells stably transfected with the control pEF1 vector, then loaded with Fluo-4 and NP-EGTA (caged  $\text{Ca}^{2+}$ ) by initiating photolysis of NP-EGTA in a single cell using laser illumination.

**Supplementary Movie 2.** Real-time  $\text{Ca}^{2+}$  wave propagation in C2C12 cells transfected with pEF1/Panx3 vector. The  $\text{Ca}^{2+}$  wave was measured in C2C12 cells stably transfected with the pEF1/Panx3 vector, then loaded with Fluo-4 and NP-EGTA (caged  $\text{Ca}^{2+}$ ) by initiating photolysis of NP-EGTA in a single cell using laser illumination.

**Supplementary Movie 3.** Real-time  $\text{Ca}^{2+}$  wave propagation in C2C12 cells transfected with Ser68Ala vector. The  $\text{Ca}^{2+}$  wave was measured in C2C12 cells stably transfected with the Ser68Ala vector, then loaded with Fluo-4 and NP-EGTA (caged  $\text{Ca}^{2+}$ ) by initiating photolysis of NP-EGTA in a single cell using laser illumination.

**Supplementary Movie 4.** Real-time FRET images represent the CFP/YFP emission ratio of Panx3 protein conformation in cells transiently co-transfected with CFP-Panx3 vector and Panx3-YFP vector without apyrase. Time-lapse FRET imaging was captured for 30 s after ATP stimulation.

**Supplementary Movie 5.** Real-time FRET images represent the CFP/YFP emission ratio of Panx3 protein conformation in cells transiently co-transfected with CFP-Panx3 vector and Panx3-YFP vector with apyrase (20 U). Time-lapse FRET imaging was captured for 30 s after ATP stimulation.

**Supplementary Movie 6.** Real-time FRET images represent the CFP/YFP emission ratio of Panx3 protein conformation in cells transiently co-transfected with CFP-Ser68Ala vector and Ser68Ala-YFP vector without apyrase. Time-lapse FRET imaging was captured for 30 s after ATP stimulation.

### **Full Original Blots-I.**

Panel Aa: These figures display the full original blots for Fig.1Aa shown in the text/Results.

Panel Ba: These figures display the full original blots for Fig.1Ba shown in the text/Results. The identification of bands was based on the expected molecular weight. For details see legend of Fig.1. The same blot of V5 antibody was stripped and re-blotted using anti- $\alpha$ -tubulin antibody for loading control. Areas presented in the manuscript figures are boxed.

### **Full Original Blots-II.**

Panel C: These figures display the full original blots for Fig.2C shown in the text/Results. The identification of bands was based on the expected molecular weight. For details see legend of Fig.2. The same blot of V5 antibody was stripped and re-blotted using anti- $\alpha$ -tubulin antibody for loading control. Areas presented in the manuscript figures are boxed.

### **Full Original Blots-III.**

Panel B: These figures display the full original blots for Fig.3B shown in the text/Results. Panel C: These figures display the full original blots for Fig.3C shown in the text/Results. The identification of bands was based on the expected molecular weight. For details see legend of Fig.3. The same blot of V5 (Panel B) or Panx3 (Panel C) antibody was stripped and re-blotted using anti- $\alpha$ -tubulin antibody for loading control. Areas presented in the manuscript figures are boxed.

### **Full Original Blots-IV.**

Panel A: These figures display the full original blots for Fig.6A shown in the text/Results. Panel B: These figures display the full original blots for Fig.6B shown in the text/Results. Panel C: These figures display the full original blots for Fig.6C shown in the text/Results. Panel D: These figures display the full original blots for Fig.6D shown in the text/Results. Panel Ea and b: These figures display the full original blots for Fig.6Ea and b shown in the text/Results. The identification of bands was based on the expected molecular weight. For details see legend of Fig.6. The same blot of Panx3 antibody in Panel E was cut at around 60 kDa, stripped and re-blotted using anti- $\alpha$ -tubulin antibody for loading control. Areas presented in the manuscript figures are boxed.

**A**

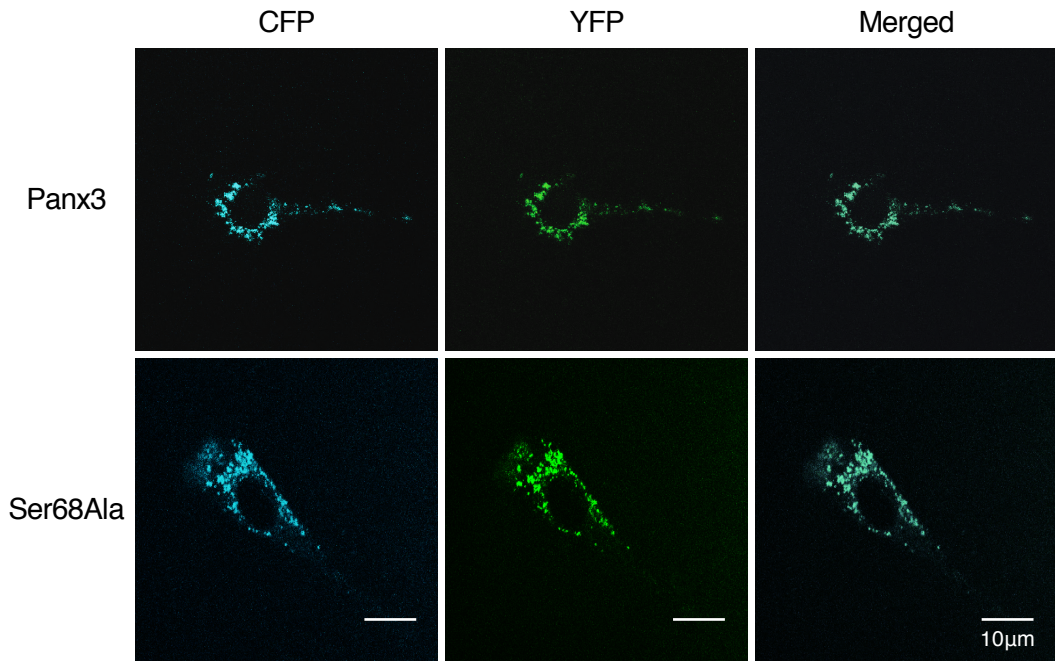

**B**

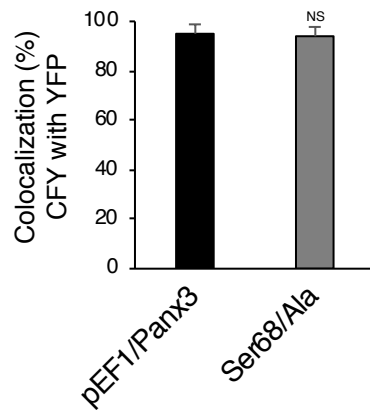

**A**  
**a**

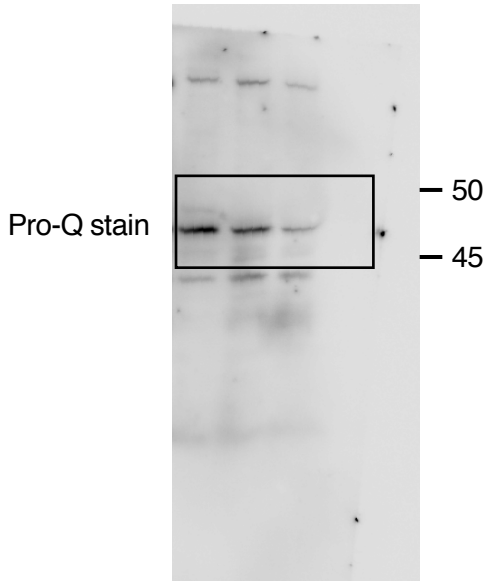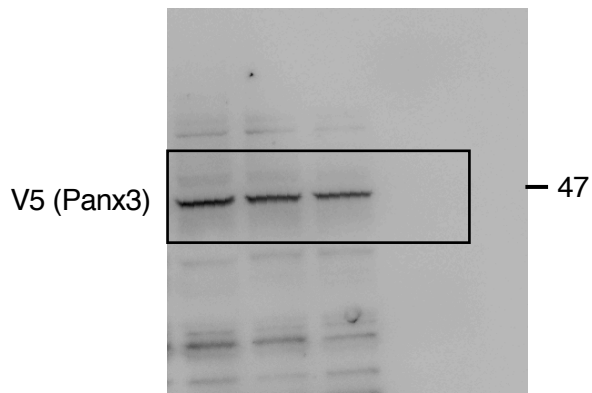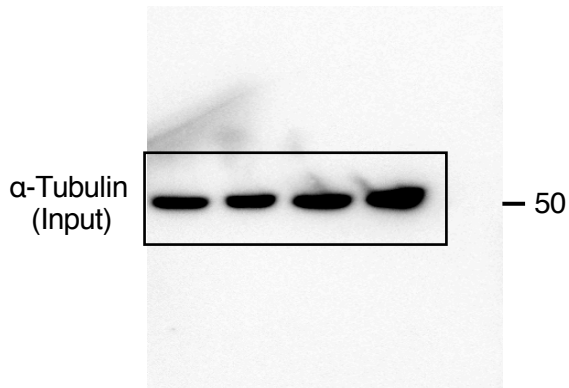

**B**  
**a**

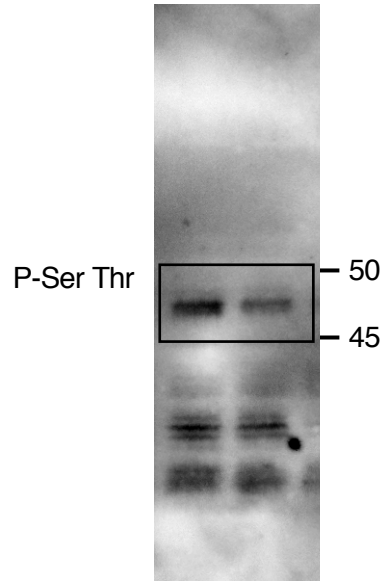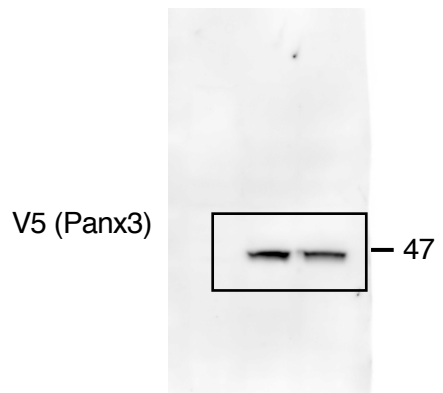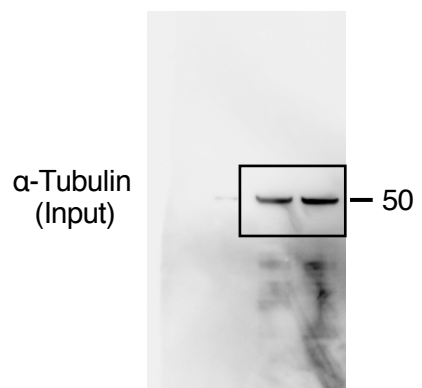

C

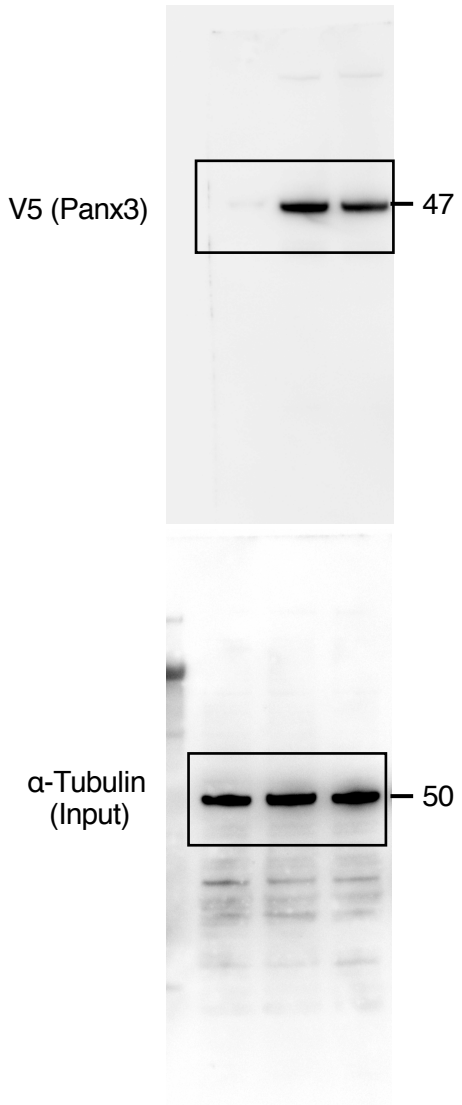

**B**

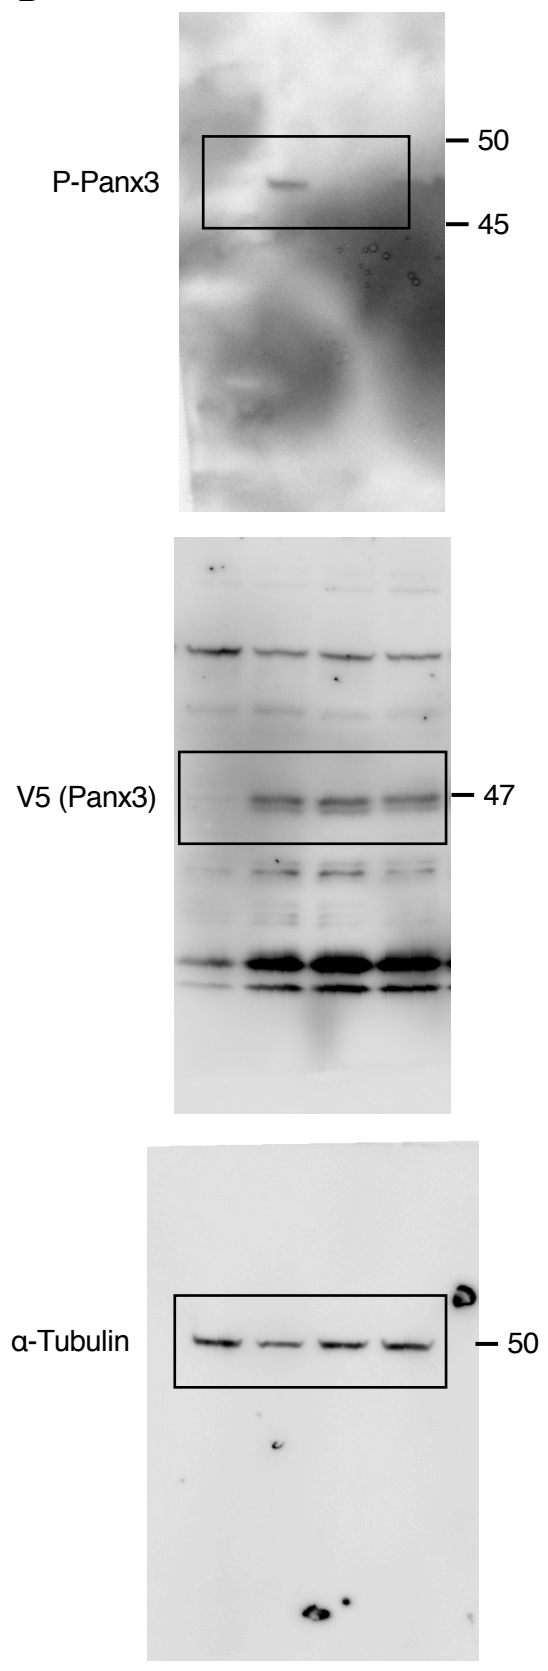

**C**

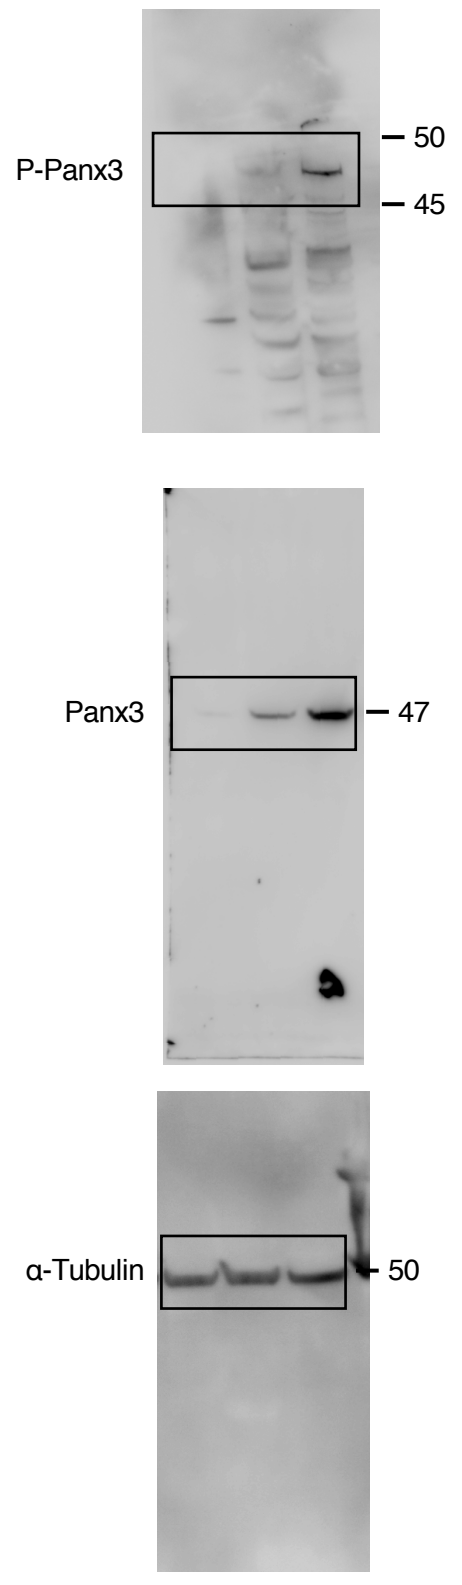



**A**

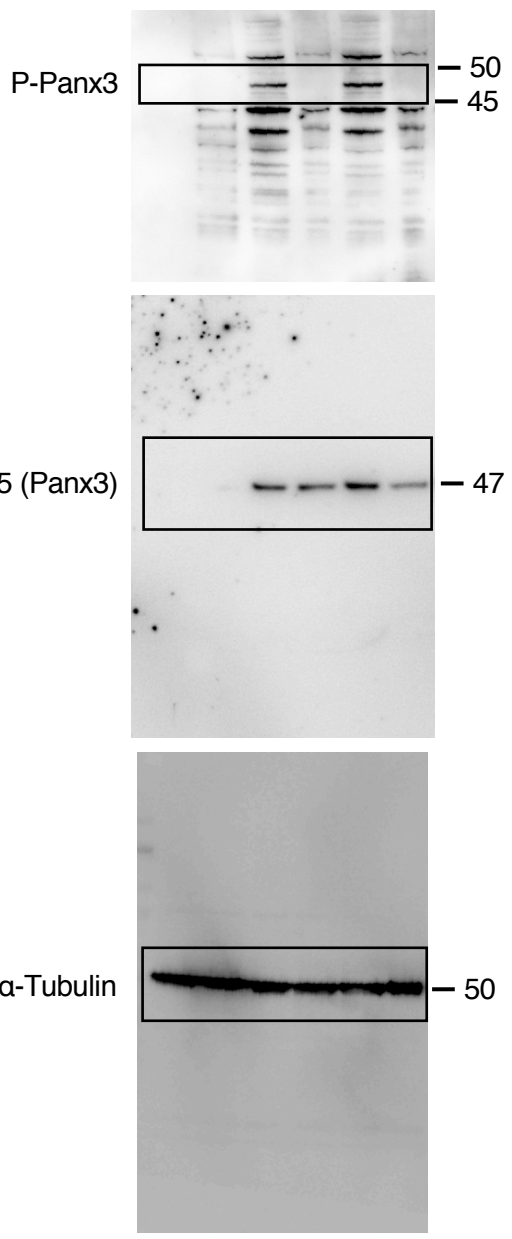

**B**

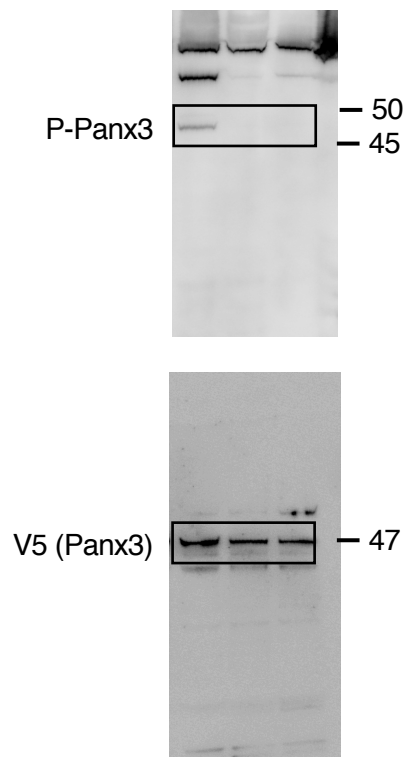

**C**

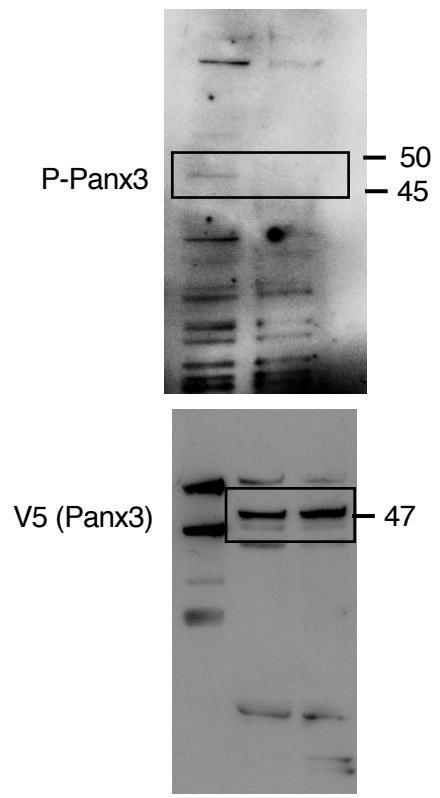

**D**

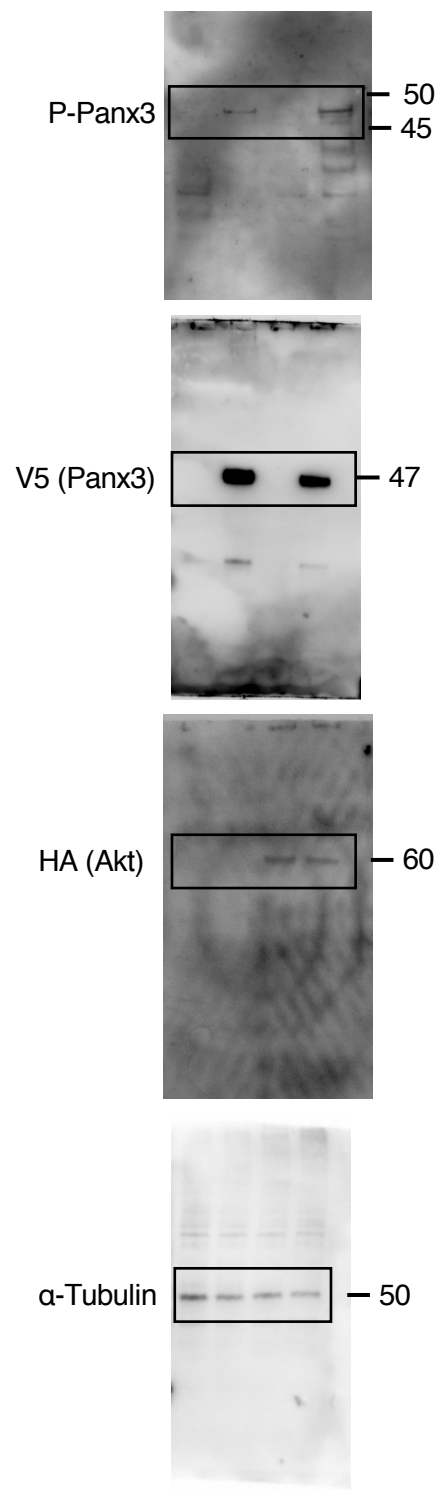

**E**

**a**

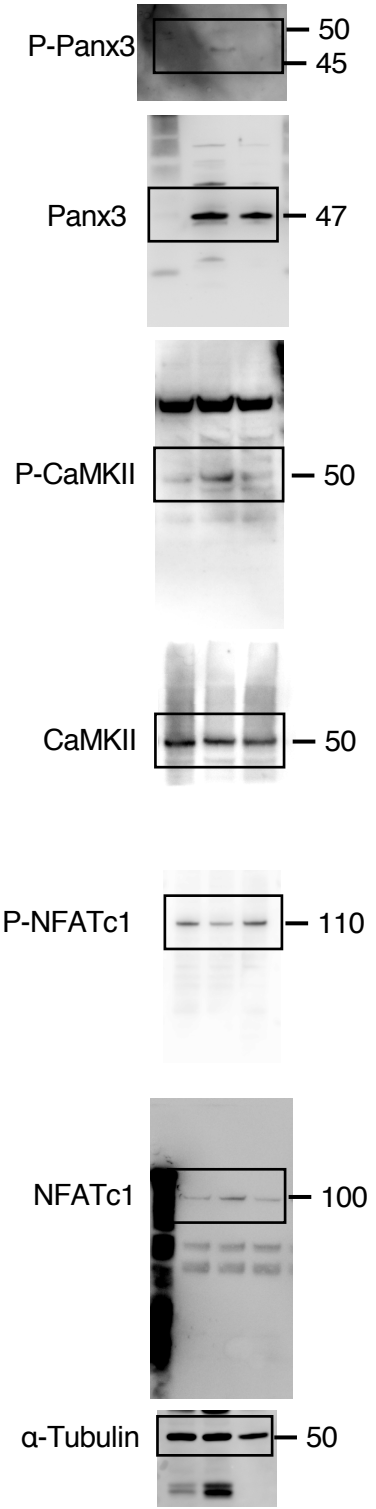

**b**

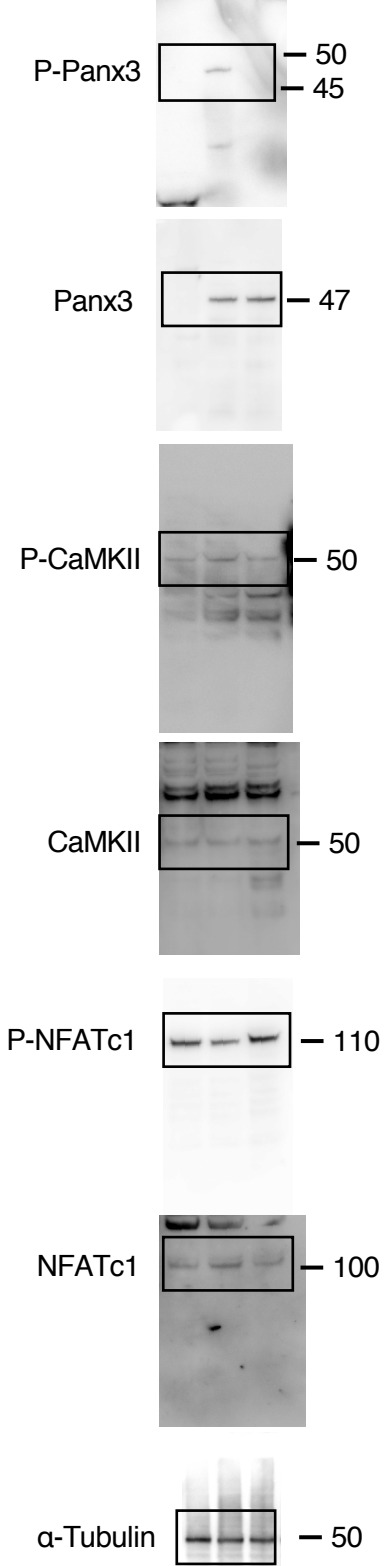

Supplement: 41598_2019_55371_MOESM1_ESM.pdf [file 41598_2019_55371_MOESM1_ESM.pdf]
